# Supplementary material for: Piezo buffers mechanical stress via modulation of intracellular Ca2+ handling in the Drosophila heart
Source: bioRxiv or medRxiv preprint supplement (doi:10.1101/2022.05.06.490878), 2022-05-06

Supplementary Fig. 1: Piezo subcellular localisation in salivary glands

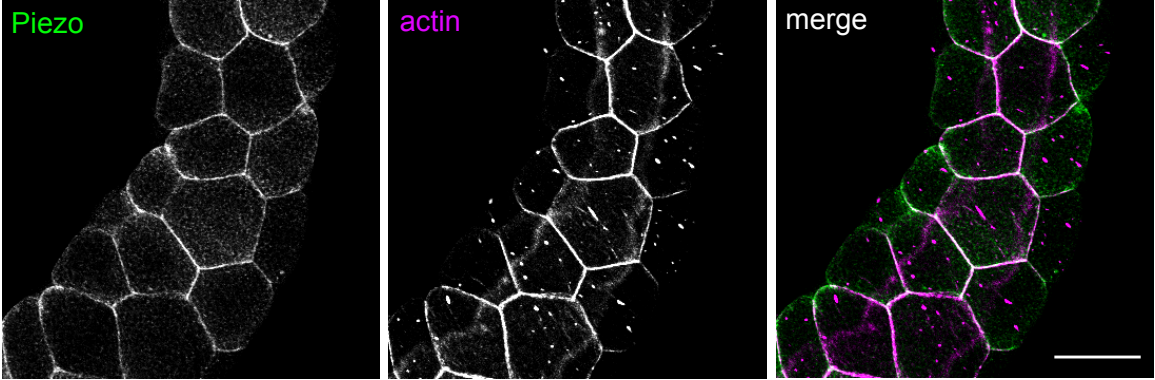

## Supplementary Fig. 2: *Piezo* hearts are physiologically normal

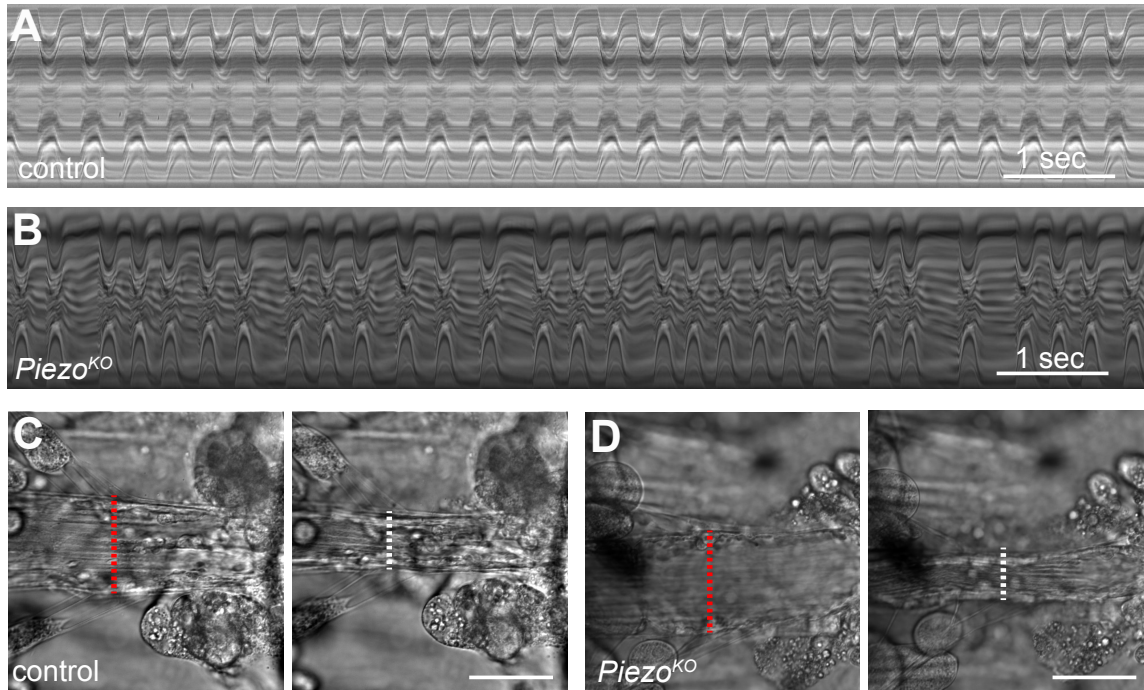

**E**

|                              | control    | <i>Piezo</i> <sup>KO</sup> |
|------------------------------|------------|----------------------------|
| Length of cardiac cycle (ms) | 35 ± 3.3   | 36 ± 1.4                   |
| Beats per second             | 2.9        | 2.8                        |
| End diastolic diameter (μm)  | 62.5 ± 2.1 | 67.4 ± 2.4                 |
| End systolic diameter (μm)   | 37.6 ± 1.8 | 35.4 ± 1.4                 |

**Supplementary Fig. 3: Custom-made devices for modulation of ambient pressure**

**A** Positive pressure

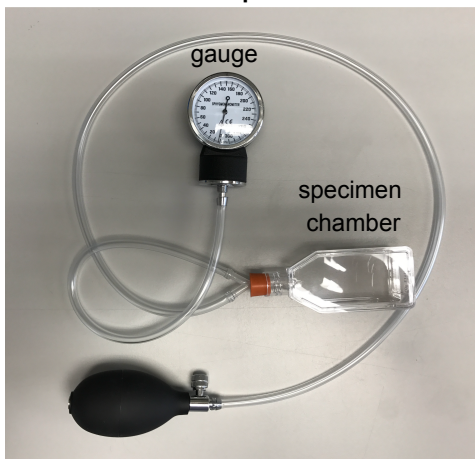

**B** Negative pressure

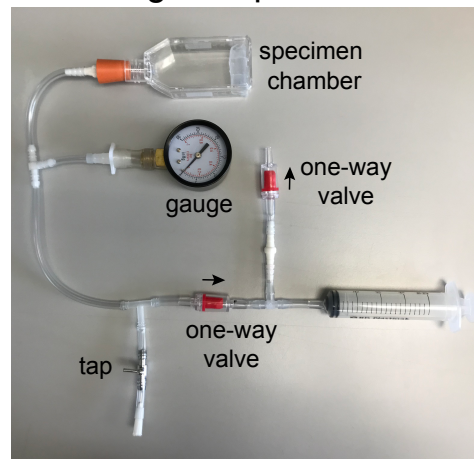

**Supplementary Fig. 4: Caffeine-induced Ca<sup>2+</sup> transients**

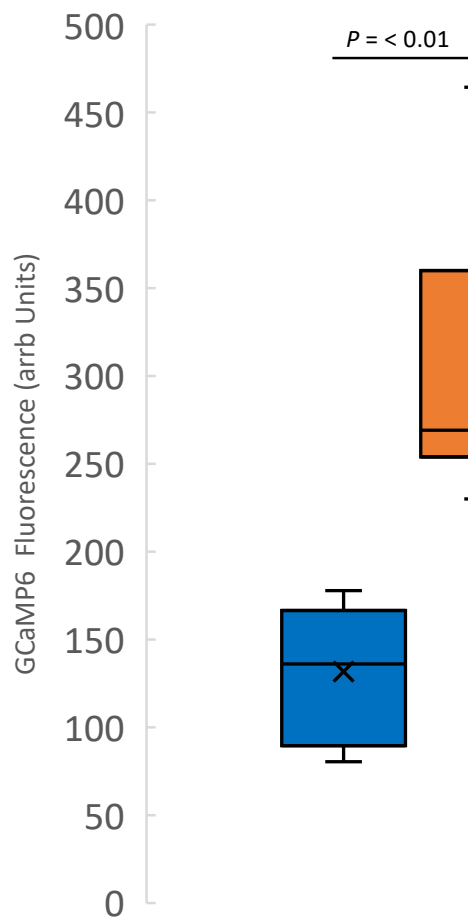

Supplement: Supplementary file [file media-1.pdf]
